# Supplementary material
Source: PubMed Central journal article supplement (PMC283519)
Supplement: pnas_100_24_13904__1.pdf [file pnas_100_24_13904__1.pdf]

**Table 2. Annotated list of RNA database files**

| NDB ID  | PDB ID | Resol. | No.res. | Name                                                  |
|---------|--------|--------|---------|-------------------------------------------------------|
| ar0001  | 402D   | 2.30   | 16      | 8-mer duplex                                          |
| ar0002  | 405D   | 2.50   | 32      | 16-mer duplex                                         |
| ar0004  | 409D   | 2.50   | 16      | 8-mer duplex                                          |
| ar0005  | 413D   | 1.80   | 13      | 13-mer (one strand)                                   |
| ar0006  | 420D   | 1.90   | 32      | 16-mer duplex                                         |
| ar0007  | 422D   | 2.60   | 24      | 12-mer duplex                                         |
| ar0008  | 433D   | 2.10   | 28      | 14-mer duplex                                         |
| ar0009  | 434D   | 1.16   | 14      | 7-bp ala-tRNA acceptor stem*                          |
| ar0011  | 438D   | 2.50   | 18      | 8-mer duplex*                                         |
| ar0012  | 439D   | 1.6    | 16      | 8-mer duplex (with "wobble-like" G.C.)                |
| ar0013  | 466D   | 1.16   | 14      | 7-mer duplex from ala-tRNA of <i>Escherichia coli</i> |
| ar0020  | 1QCU   | 1.20   | 22      | Plasmid copy control*                                 |
| ar0021  | 1QCO   | 1.55   | 57      | Plasmid copy control                                  |
| ar0022  | 472D   | 1.90   | 16      | 8-mer duplex (with GG/UU)                             |
| ar0023  | 1CSL   | 1.6    | 28      | RRE high-affinity site                                |
| ar0024  | 1D4R   | 2.00   | 58      | Fragment of human SRP RNA helix 6                     |
| ar0027  | 1DQH   | 1.70   | 19      | Helix II of <i>Xenopus laevis</i> somatic 5S RNA*     |
| ar0028  | 1DUJ   | 2.10   | 22      | Rev. binding element of HIV-1                         |
| ar0030  | 1G2J   | 1.97   | 8       | 8-mer with phenyl ribonucleotide*                     |
| ar0032  | 1I9X   | 2.18   | 26      | BPS-U2 snRNA duplex                                   |
| ar0036  | 1KD3   | 1.80   | 22      | 11-mer duplex, thallium                               |
| ar0038  | 1KD5   | 1.58   | 22      | 11-mer duplex, metal-free*                            |
| ar0040  | 1L3Z   | 2.01   | 14      | 7-mer duplex*                                         |
| ar0044  | 1NLC   | 1.85   | 46      | HIV-1 DIS(MAL) genomic RNA                            |
| arb002  |        | 0.8    | 4       | AU duplex*                                            |
| arb003  |        | 1.1    | 4       | GC duplex-calcium*                                    |
| arb004  |        | 0.89   | 4       | GC duplex-sodium*                                     |
| arb005  |        | 0.85   | 4       | GC duplex-ammonium octahydrate*                       |
| arf0108 | 377D   | 1.76   | 12      | 6-mer duplex                                          |
| arh064  | 1RXB   | 1.80   | 16      | 8-mer duplex*                                         |
| arh074  | 259D   | 1.46   | 16      | 8-mer duplex, hydration study*                        |
| arl037  | 255D   | 2.00   | 12      | One strand of duplex*                                 |
| arl048  | 157D   | 1.80   | 24      | 12-mer duplex                                         |
| arl062  | 1SDR   | 2.60   | 24      | <i>E. coli</i> Shine--Dalgarno seq*                   |
| arn035  | 1RNA   | 2.25   | 28      | 14-mer [U(U-A) <sub>6</sub> A] <sub>2</sub>           |
| dr0005  | 1F27   | 1.30   | 30      | Biotin-binding RNA pseudoknot                         |
| dr0008  | 1MWL   | 2.40   | 43      | Eubacterial 16S rRNA A site                           |
| dr0010  | 1NTB   | 2.90   | 40      | Streptomycin RNA-aptamer complex                      |
| drb002  |        | 0.90   | 2       | AA + proflavine*                                      |
| drb003  |        | 1.00   | 2       | AU + 9-aminoacridine*                                 |
| drb005  |        | 0.8    | 2       | CA + proline*                                         |
| drb007  |        | 1.34   | 4       | CG duplex + ethidium*                                 |
| drb008  |        | 0.85   | 2       | CG + proflavin*                                       |
| drb018  |        | 1.1    | 4       | UA duplex + ethidium                                  |
| drd004  |        | 1.00   | 4       | CA/UG duplex + proflavine*                            |
| pd0345  | 1MSW   | 2.10   | 10      | RNA message, phage T7 RNA                             |
| pr0005  | 1DRZ   | 2.30   | 72      | Hepatitis delta virus genomic ribozyme                |
| pr0006  | 1QF6   | 2.90   | 76      | Threonine tRNA from <i>E. coli</i>                    |
| pr0007  | 1CVJ   | 2.60   | 9       | Polyadenylate 9-mer [with poly(A)-bdg protein]        |
| pr0008  | 2A8V   | 2.40   | 9       | RNA/rho transcription termination F                   |
| pr0009  | 1C9S   | 1.90   | 5       | GAGAU-repeats/TRP RNA-bdg attenuation protein         |
| pr0010  | 1CX0   | 2.30   | 72      | Hepatitis delta virus nested double pseudoknot        |
| pr0011  | 1B7F   | 2.60   | 12      | TRA pre-mRNA                                          |
| pr0015  | 1QA6   | 2.80   | 58      | 1051-1108 from <i>E. coli</i> 23S rRNA                |
| pr0017  | 1DDL   | 2.7    | 9       | RNA from desmodium yellow mottle tymovirus            |
| pr0018  | 1DFU   | 1.80   | 38      | Loop E-helix IV fragments from 5S rRNA <i>E. coli</i> |
| pr0019  | 1C0A   | 2.40   | 76      | Asp-tRNA                                              |
| pr0020  | 1DI2   | 1.90   | 20      | 10-mer (with dsRNA-binding domain)                    |
| pr0021  | 1DUL   | 1.80   | 48      | 4.5S RNA domain IV                                    |
| pr0022  | 1EC6   | 2.40   | 20      | 20-mer RNA hairpin                                    |

|        |      |      |      |                                                                   |
|--------|------|------|------|-------------------------------------------------------------------|
| pr0026 | 1EUY | 2.60 | 75   | Gln-tRNA                                                          |
| pr0030 | 1F7U | 2.2  | 76   | Arg-tRNA                                                          |
| pr0032 | 1FFY | 2.2  | 74   | Ile-tRNA                                                          |
| pr0033 | 1FXL | 1.80 | 7    | Fragment of C-FOS AU-rich element                                 |
| pr0034 | 1G2E | 2.30 | 10   | Fragment of AU-rich element of TNF alpha RNA                      |
| pr0036 | 1F8V | 3.00 | 25   | RNA from pariacoto virus                                          |
| pr0037 | 1HQ1 | 1.52 | 48   | 4.5S RNA domain 4 (res 32-74)                                     |
| pr0040 | 1E7X | 2.38 | 16   | RNA hairpin (with coat protein) from phage MS2                    |
| pr0046 | 1I5L | 2.75 | 3    | UUU with snRNP SM-like protein AF-SM1                             |
| pr0047 | 1I6U | 2.60 | 37   | 16S rRNA fragment from <i>Methanococcus jannaschii</i> , with S8P |
| pr0051 | 1JBR | 2.15 | 62   | Ribotoxin and 31-mer SRD RNA inhibitor                            |
| pr0053 | 1JBT | 2.7  | 29   | Sarcin/ricin domain RNA analog                                    |
| pr0055 | 1E7K | 2.90 | 22   | U4 snRNA                                                          |
| pr0057 | 1H4S | 2.85 | 66   | Pro-tRNA + tRNA <sup>pro</sup> (CGG) from <i>T. thermophilus</i>  |
| pr0060 | 1K8W | 1.85 | 22   | T stem-loop RNA                                                   |
| pr0062 | 1GKW | 2.56 | 26   | MS2 RNA hairpin                                                   |
| pr0063 | 1KNZ | 2.45 | 5    | Rotavirus mRNA 3' consensus                                       |
| pr0065 | 1KQ2 | 2.71 | 7    | RNA with host factor for Q beta                                   |
| pr0067 | 1L9A | 2.90 | 137  | Signal recognition particle RNA S domain                          |
| pr0069 | 1IVS | 2.90 | 75   | Val-tRNA                                                          |
| pr0071 | 1GTF | 1.75 | 4    | GAGUU repeat RNA with TRP-protein                                 |
| pr0073 | 1LNG | 2.30 | 97   | 7S.S SRP RNA                                                      |
| pr0075 | 1M50 | 2.20 | 21   | RNA hairpin ribozyme with U1A, STR virus                          |
| pr0078 | 1M8V | 2.60 | 41   | Uridine heptamer (with snRNP sm-like protein)                     |
| pr0079 | 1M8W | 2.20 | 30   | NRE1-19 RNA                                                       |
| pr0080 | 1M8X | 2.20 | 15   | NRE1-14 RNA                                                       |
| pr0081 | 1M8Y | 2.60 | 10   | NRE2-10 RNA                                                       |
| pr0083 | 1MJ1 | 2.50 | 34   | 5S rRNA fragment                                                  |
| pr0085 | 1MZP | 2.65 | 55   | 23S rRNA fragment (L1 protuberance)                               |
| pr0090 | 1N78 | 2.10 | 76   | Glu-tRNA                                                          |
| pr0091 | 1NB7 | 2.90 | 4    | U-template for HC-JR RNA polymerase                               |
| prv001 | 1BMV | 3.00 | 11   | RNA in icosahedral virus (bountiful bean)                         |
| prv004 | 2BBV | 2.80 | 10   | RNA in black beetle virus                                         |
| prv010 | 6MSF | 2.80 | 24   | RNA in MS2                                                        |
| prv020 | 1A34 | 1.81 | 21   | RNA in satellite tobacco mosaic virus                             |
| prv021 | 1ZDJ | 2.90 | 16   | 8-NT MS2 variant RNA fragment                                     |
| pte003 | 1QTQ | 2.25 | 76   | Gln-tRNA                                                          |
| ptr004 | 1SER | 2.90 | 66   | Ser-tRNA                                                          |
| ptr016 | 1A9N | 2.38 | 24   | U2 snRNA hairpin IV                                               |
| rr0005 | 1DK1 | 2.80 | 52   | rRNA fragment with S15 (30S)                                      |
| rr0010 | 1F7Y | 2.80 | 52   | 16S rRNA fragment (w/ UUCG tetraloops)                            |
| rr0016 | 1FJG | 3.00 | 1513 | 30S ribosomal subunit                                             |
| rr0019 | 1G1X | 2.60 | 84   | 16S rRNA fragments                                                |
| rr0033 | 1JJ2 | 2.40 | 2876 | <i>Haloarcula marismortui</i> large ribosomal subunit             |
| tr0001 | 1EHZ | 1.93 | 76   | Phe-tRNA                                                          |
| trna12 | 1YFG | 3.00 | 76   | Yeast initiator tRNA                                              |
| uh0001 | 1BR3 | 3.00 | 13   | RNA complex with 10-23 DNA enzyme                                 |
| uhx026 | 1HMH | 2.60 | 34   | Hammerhead ribozyme (RNA-DNA) RNA strand                          |
| ur0001 | 429D | 2.7  | 24   | Lead-dependent ribozyme                                           |
| ur0004 | 437D | 1.6  | 28   | RNA pseudoknot from beet western yellow virus                     |
| ur0005 | 462D | 2.30 | 46   | HIV-1 genomic RNA dimerization initiation site                    |
| ur0007 | 483D | 1.11 | 27   | Sarcin/ricin rRNA domain from <i>E. coli</i>                      |
| ur0009 | 1DUH | 2.7  | 45   | Conserved domain IV of <i>E. coli</i> 4.5S RNA                    |
| ur0012 | 1HR2 | 2.25 | 157  | PR-P6 DELC209 mut, tetrahymena group I intron                     |
| ur0014 | 1J8G | 0.61 | 24   | RNA tetraplex                                                     |
| ur0015 | 1JJM | 2.60 | 46   | HIV-1(LAI) genomic RNA 265-287                                    |
| ur0019 | 1KXX | 3.00 | 70   | Domains 5,6 of AI5G group II self-splicing intron                 |
| ur0020 | 1L2X | 1.25 | 28   | RNA pseudoknot, beet western yellow virus                         |
| ur0022 | 1L8V | 2.80 | 157  | P4-P6 RNA ribozyme domain group I intron                          |
| ur0026 | 1MSY | 1.41 | 27   | GUAA tetraloop mutant, sarcin/ricin from 23S*                     |
| urb003 |      | 1.00 | 2    | AA*                                                               |
| urb008 |      | 1.00 | 2    | UA*                                                               |

|        |      |      |     |                                                           |
|--------|------|------|-----|-----------------------------------------------------------|
| urb016 |      | 0.86 | 4   | UA/UA*                                                    |
| urc002 |      | 0.95 | 3   | AAA*                                                      |
| urf042 | 1OSU | 1.40 | 6   | Half of double helix, with UU overhang*                   |
| url029 | 205D | 2.64 | 24  | Double helix with UU-pair in internal loop                |
| url050 | 280D | 2.40 | 24  | RNA dodecamer with internal loop                          |
| urt068 | 361D | 3.00 | 20  | Domain E of <i>Thermus flavus</i> 5S rRNA, with tetraloop |
| urx053 | 1GID | 2.50 | 158 | P4-P6 ribozyme domain                                     |
| urx059 | 301D | 3.00 | 41  | RNA hammerhead ribozyme                                   |
| urx063 | 353D | 2.40 | 24  | Domain A of <i>T. flavus</i> 5S rRNA*                     |
| urx075 | 397D | 1.30 | 27  | HIV-1 transactivation response region                     |

NDB, Nucleic Acid Database; PDB, Protein Data Bank; ID, identification; Resol., resolution.

\*No backbone clashes.
