# Supplementary material
Source: PubMed Central journal article supplement (PMC283519)
Supplement: pnas_100_24_13904__2.pdf [file pnas_100_24_13904__2.pdf]

**Table 3. Dihedral angle values for RNA suite backbone conformers**

| Name                | $\delta_{-1}$ | $\epsilon_{-1}$ | $\zeta_{-1}$ | $\alpha$ | $\beta$ | $\gamma$ | $\delta$ |
|---------------------|---------------|-----------------|--------------|----------|---------|----------|----------|
| 3' e p p t p 3'     | 84            | -150            | 60           | 65       | 180     | 55       | 84       |
| 3' e -140 p t p 3'  | 84            | -125            | -140         | 65       | 180     | 55       | 84       |
| 3' e m p t p 3'     | 84            | -120            | -100         | 70       | 180     | 55       | 84       |
| 2' e p p t p 3'     | 147           | -100            | 85           | 65       | 180     | 55       | 84       |
| 2' e t p t p 3'     | 147           | -120            | 175          | 65       | 180     | 55       | 84       |
| 2' e m p t p 3'     | 147           | -100            | -100         | 65       | 180     | 55       | 84       |
| 3' e p p 110 t 3'   | 84            | -150            | 60           | 65       | 110     | 180      | 84       |
| 2' e p p t t 3'     | 147           | -100            | 85           | 70       | -170    | 180      | 84       |
| 3' e m t t p 3'     | 84            | -150            | -75          | 165      | 165     | 55       | 84       |
| 2' e p t t p 3'     | 147           | -100            | 85           | 165      | 165     | 55       | 84       |
| 2' e t t t p 3'     | 147           | -120            | 175          | 165      | 165     | 55       | 84       |
| 2' e m t t p 3'     | 147           | -100            | -70          | 165      | 165     | 55       | 84       |
| 3' e m t 135 t 3'   | 84            | -150            | -75          | 170      | 135     | 175      | 84       |
| 3' e m t t t 3'     | 84            | -150            | -75          | 155      | -175    | 180      | 84       |
| 3' e t m t p 3'     | 84            | -140            | 175          | -65      | 175     | 55       | 84       |
| 3' e -140 m t p 3'  | 84            | -125            | -140         | -65      | 175     | 55       | 84       |
| 3' e m m t p 3'     | 84            | -150            | -75          | -65      | 175     | 55       | 84       |
| 2' e t m t p 3'     | 147           | -120            | 175          | -65      | 175     | 55       | 84       |
| 2' e m m t p 3'     | 147           | -100            | -70          | -65      | 175     | 55       | 84       |
| 3' e m m -135 p 3'  | 84            | -150            | -75          | -65      | -135    | 55       | 84       |
| 3' e m -110 80 t 3' | 84            | -150            | -75          | -110     | 80      | 170      | 84       |
| 2' e m m t t 3'     | 147           | -100            | -70          | -65      | 170     | 180      | 84       |
| 3' e p p t p 2'     | 84            | -150            | 60           | 65       | 180     | 55       | 147      |
| 3' e t p t p 2'     | 84            | -140            | 175          | 65       | 180     | 55       | 147      |
| 3' e -140 p t p 2'  | 84            | -125            | -140         | 65       | 180     | 55       | 147      |
| 2' e p p t p 2'     | 147           | -100            | 85           | 65       | 180     | 55       | 147      |
| 2' e t p t p 2'     | 147           | -120            | 175          | 65       | 180     | 55       | 147      |
| 3' e p p 110 t 2'   | 84            | -150            | 60           | 65       | 110     | 180      | 147      |
| 3' e -140 p t m 2'  | 84            | -125            | -140         | 65       | 170     | -60      | 147      |
| 3' e p t t p 2'     | 84            | -150            | 45           | 155      | 150     | 55       | 147      |
| 3' e m t t p 2'     | 84            | -150            | -75          | 165      | 165     | 55       | 147      |
| 3' e m t t t 2'     | 84            | -165            | -75          | 180      | -175    | 180      | 147      |
| 3' e t m t p 2'     | 84            | -140            | 175          | -65      | 175     | 55       | 147      |
| 3' e -140 m t p 2'  | 84            | -125            | -140         | -65      | 175     | 55       | 147      |
| 3' e m m t p 2'     | 84            | -150            | -100         | -65      | 180     | 55       | 147      |
| 2' e p m t p 2'     | 147           | -115            | 85           | -85      | 175     | 55       | 147      |
| 2' e t m t p 2'     | 147           | -120            | 175          | -65      | 175     | 55       | 147      |
| 2' e m m t p 2'     | 147           | -100            | -70          | -65      | 175     | 55       | 147      |
| 3' e m m -135 p 2'  | 84            | -150            | -75          | -65      | -135    | 55       | 147      |
| 2' e m m -135 p 2'  | 147           | -100            | -70          | -65      | -135    | 55       | 147      |
| 3' e m m t m 2'     | 84            | -150            | -75          | -65      | -160    | -65      | 147      |
| 2' e m m t m 2'     | 147           | -100            | -70          | -65      | -160    | -65      | 147      |
